# Supplementary material
Source: ML conference proceedings conference paper supplement (https://openreview.net/forum?id=DyOXbjStzW)

**A**

target int. length 8

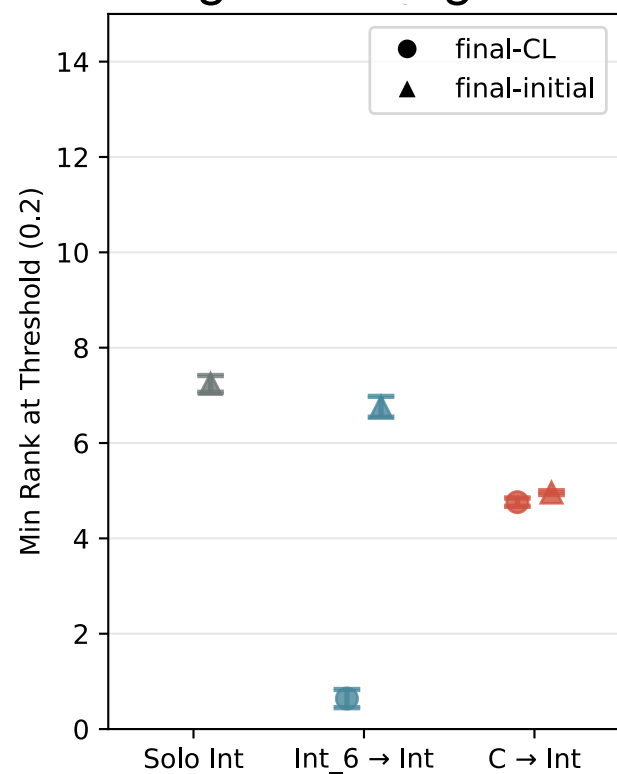

target int. length 12

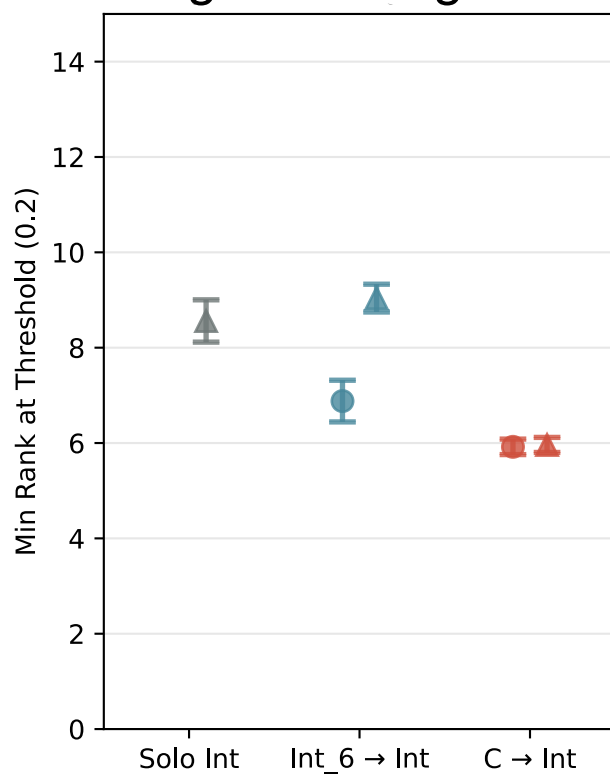

target int. length 16

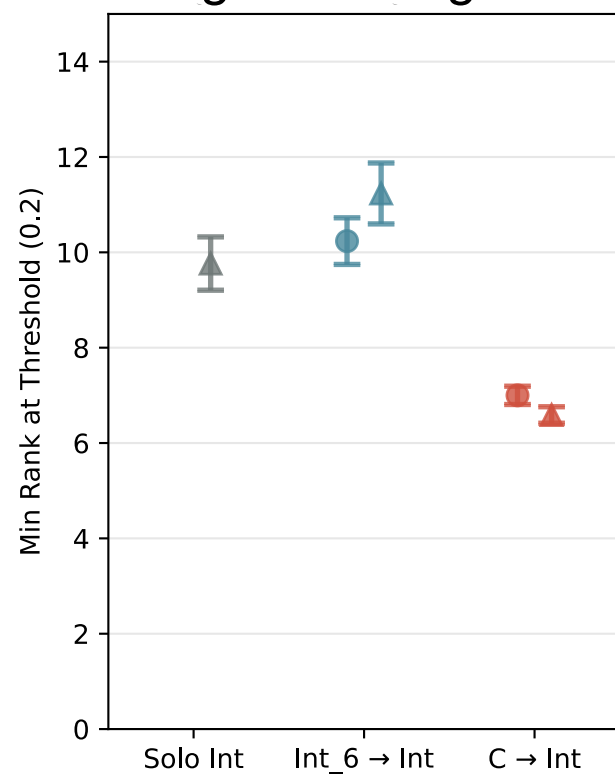**B**

target int. length 8

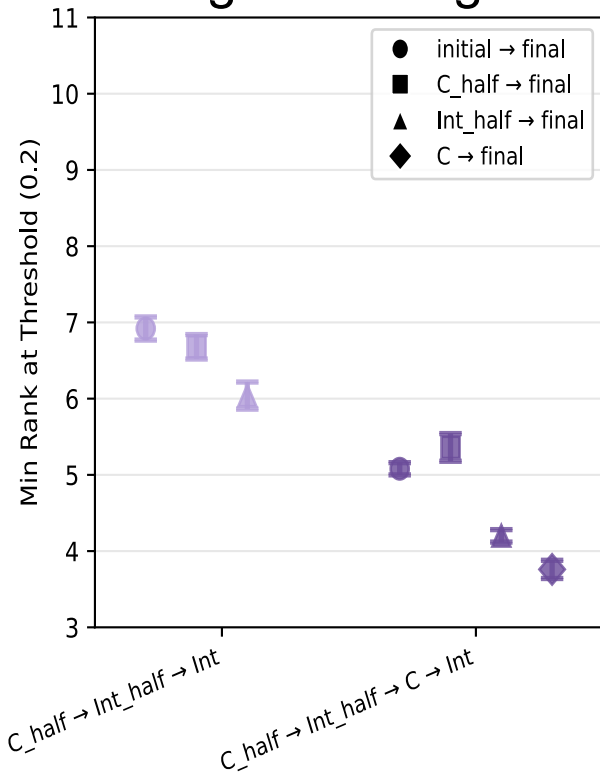

target int. length 12

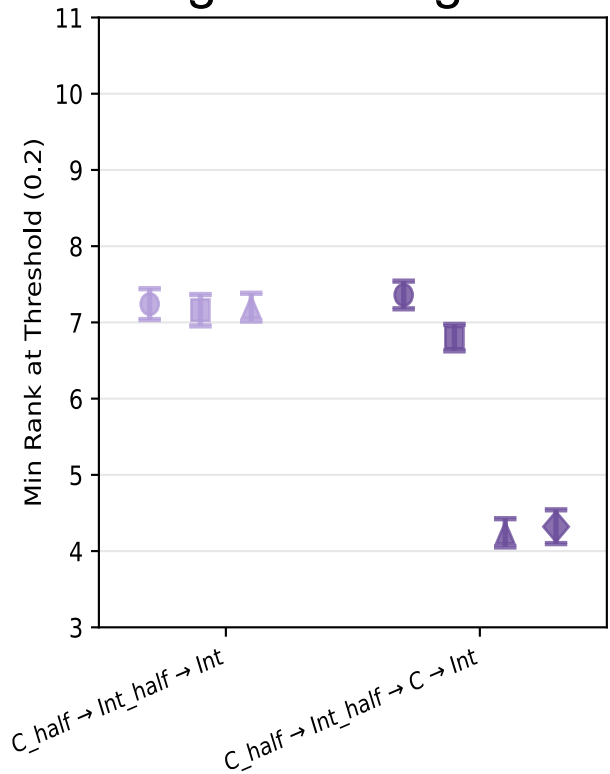

target int. length 16

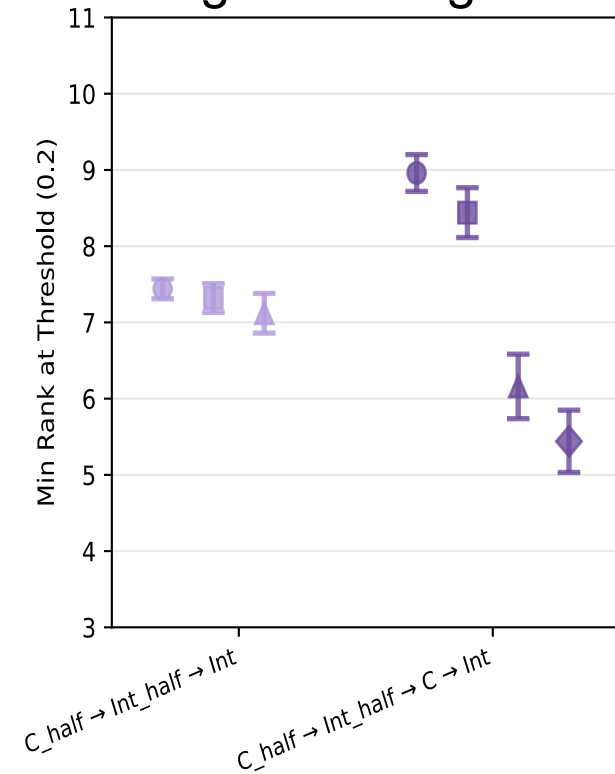

Supplement: supplementary_material [file SupplRanks.pdf › SupplRanks.pdf]
