# Supplementary material
Source: ML conference proceedings conference paper supplement (https://openreview.net/forum?id=DyOXbjStzW)

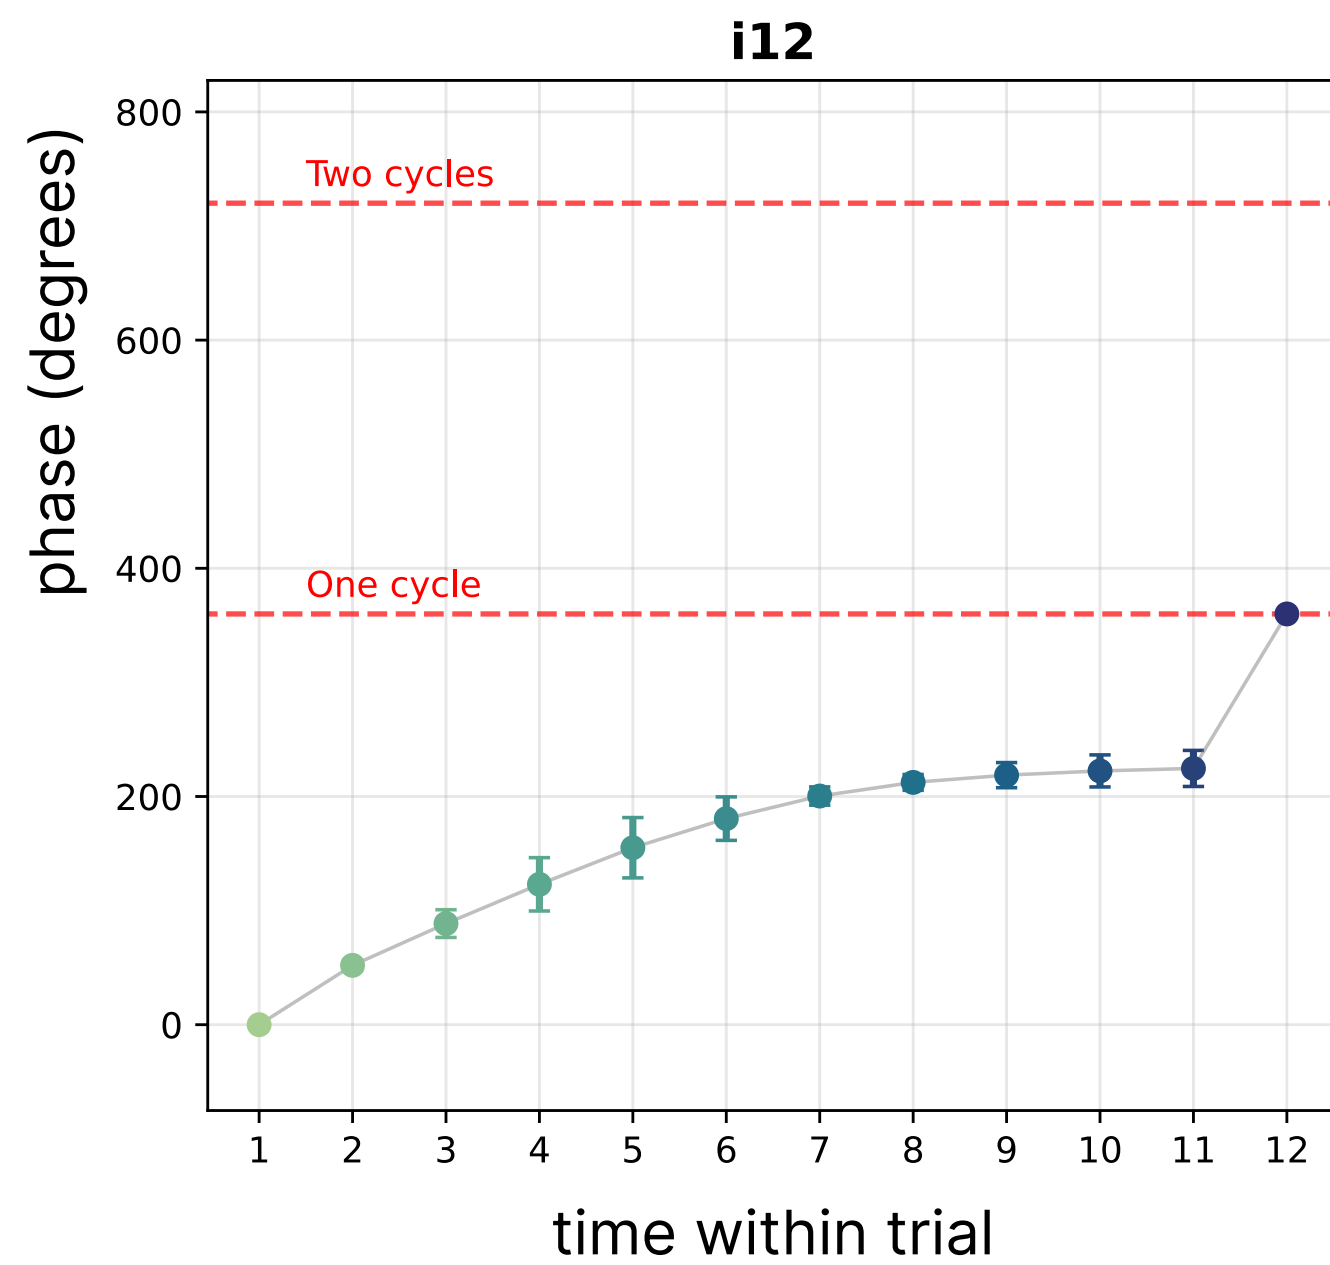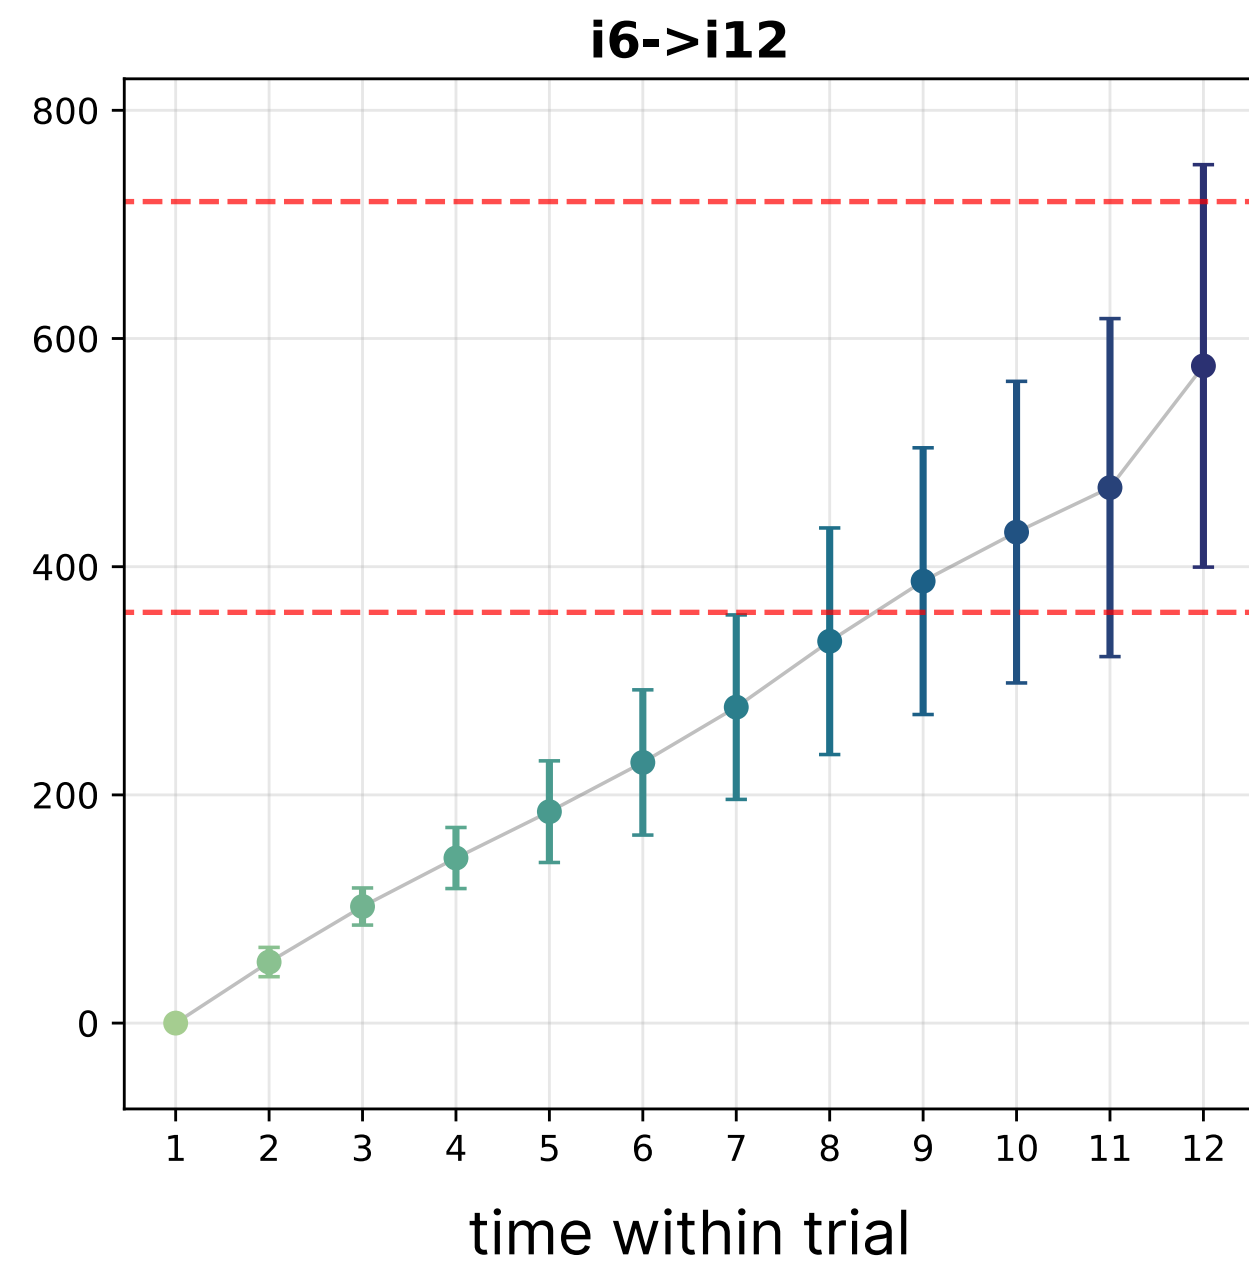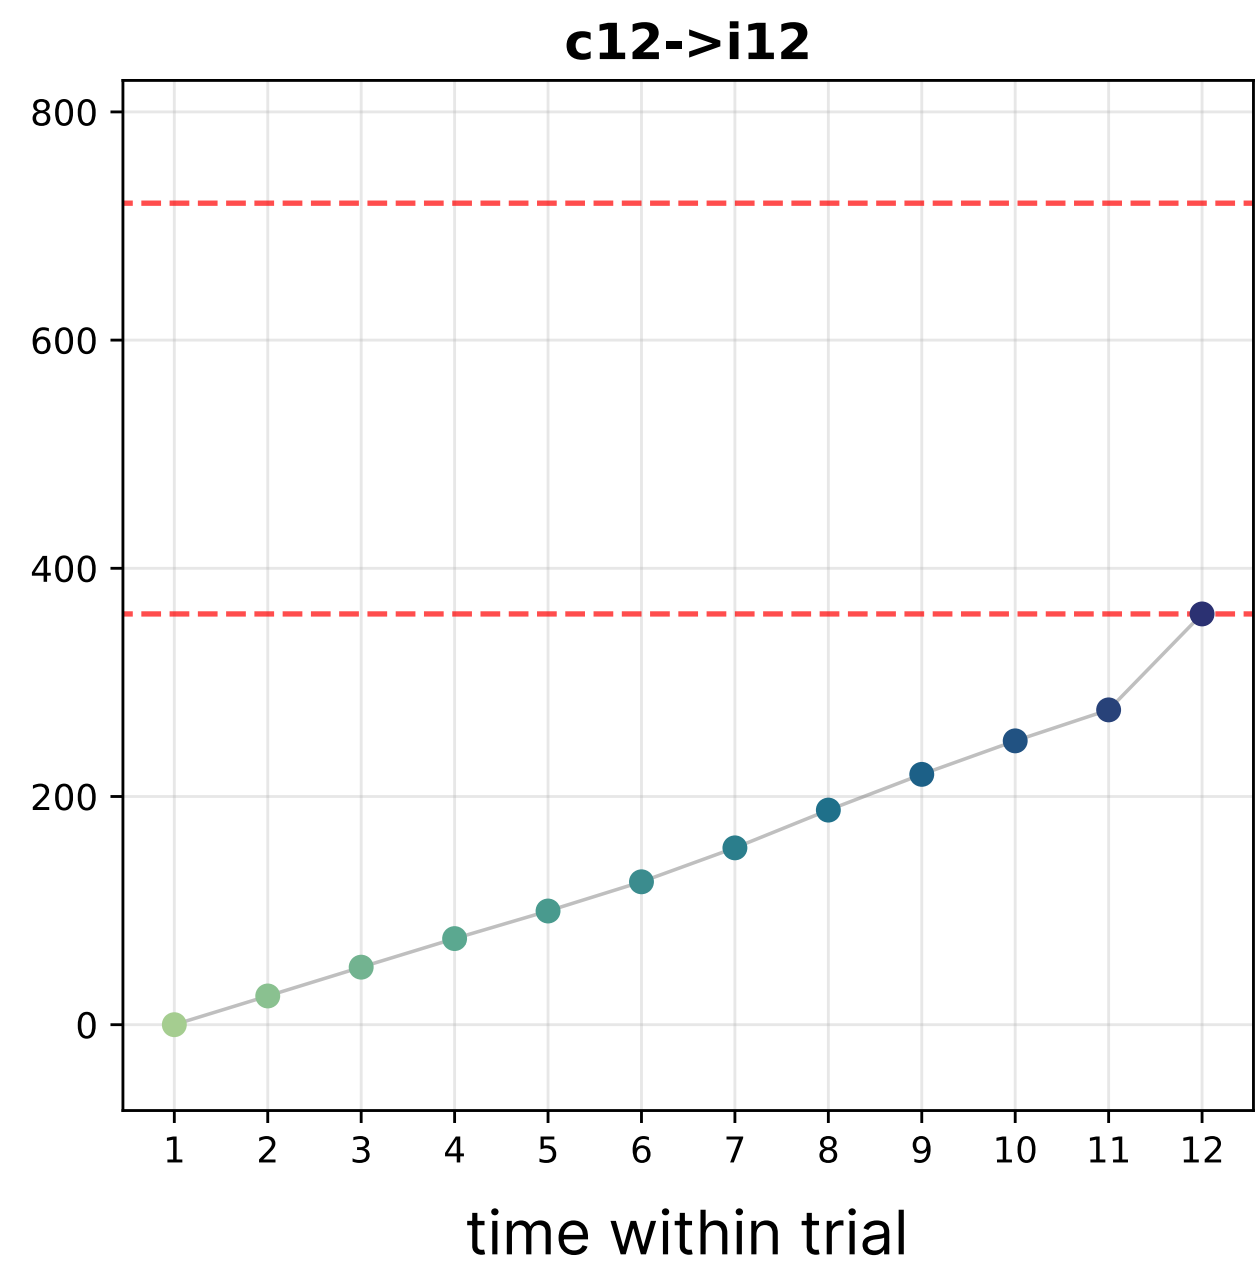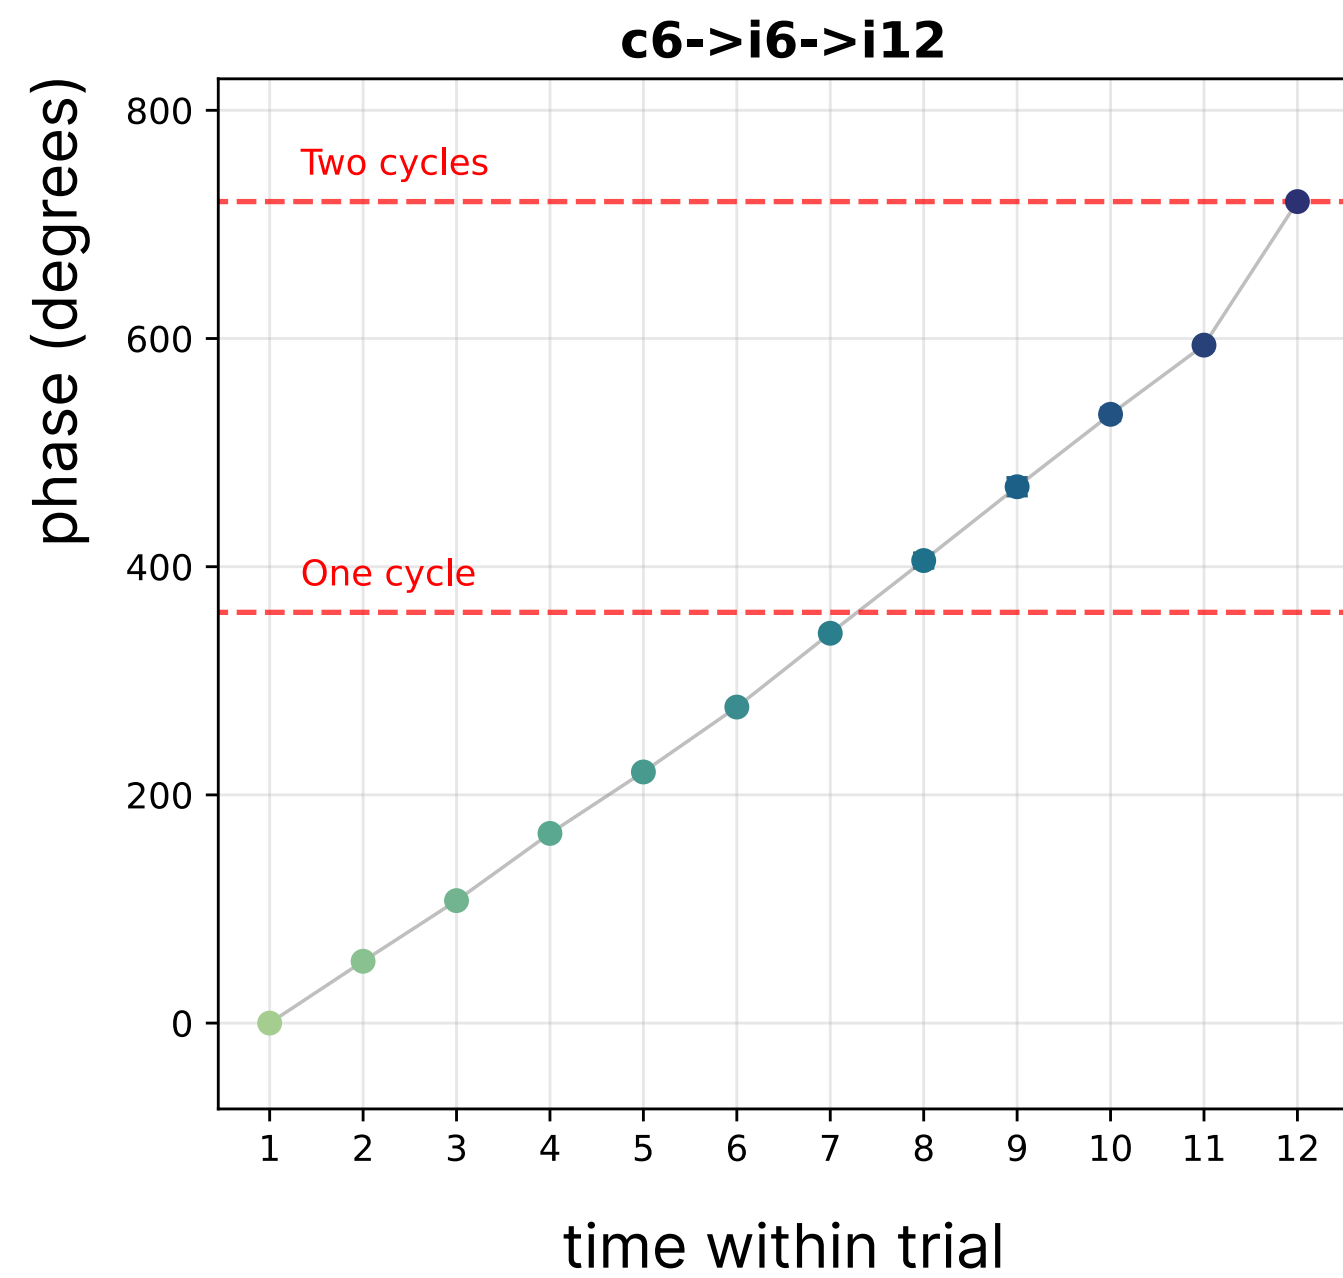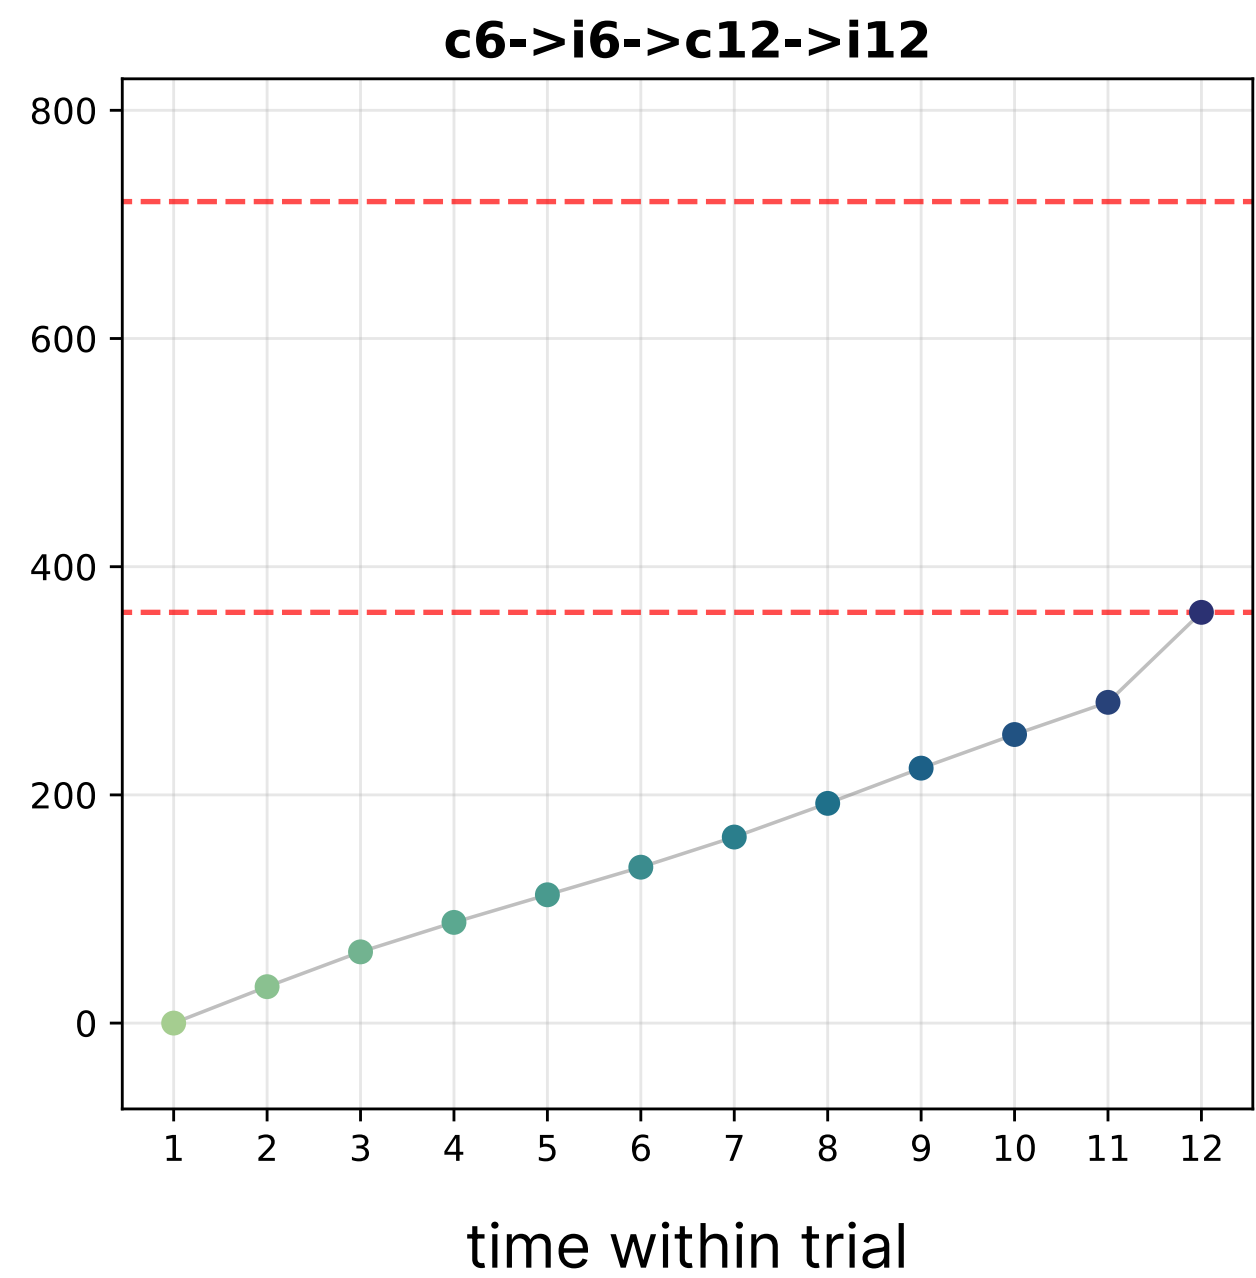

Supplement: supplementary_material [file SupplLoops.pdf › SupplLoops.pdf]
